# Supplementary material for: Posttraumatic Osteomyelitis Risks Associated with NLRP3 Gene Polymorphisms in the Chinese Population
Source: MDPI journal article supplement (doi:10.3390/jpm13020253), 2023-01-30
Supplement: s1 [file s1]

**Table S1. PCR primers and extension primers of the 25 SNPs.**

| SNP        | PCR primers                                                         | Extension primers                                                           |
|------------|---------------------------------------------------------------------|-----------------------------------------------------------------------------|
| rs2043211  | F: 5'-TGAGACACAGCGTCCAATAGT-3'<br>F: 5'-TCCAAGAAGATGATGAGACAGAGG-3' | 5'-ctgactgactgactgactgactgactGACACTCAGGAACAGCACGGA-3'                       |
| rs10754558 | F: 5'-GTGGAGTGTCTGGAGAAGAGA-3'<br>F: 5'-GCTAATTACATGAGGTCACCAAGA-3' | 5'-ctgactgactgactgactgactgactgCAATGACAGCATCGGGTGTGTGTT-3'                   |
| rs12185396 | F: 5'-GGATGTGCCTGTGAGATTATCTT-3'<br>F: 5'-CACTTCCTGAACCAACAATGC-3'  | 5'-ctgCCTGTCAGACCCTGAAACCCA-3'                                              |
| rs8299     | F: 5'-AGAGACTGACCGTTGAGAAGG-3'<br>F: 5'-ATCTTTGCCGATGAAACTGTAGT-3'  | 5'-ctgacCAATACAGTCATCAGTGGAGTC-3'                                           |
| rs580253   | F: 5'-GAGCACAAGACCTCTGACAG-3'<br>F: 5'-AATATCTACCAACCAGCCATTCAA-3'  | 5'-ctgactgaCTCTGAGCAAGTCCCAGATATA-3'                                        |
| rs501192   | F: 5'-GAGCACAAGACCTCTGACAG-3'<br>F: 5'-AATATCTACCAACCAGCCATTCAA-3'  | 5'-ctgactgactgCAGGCCTGCCGTGGTGGTGAGT-3'                                     |
| rs4796793  | F: 5'-AGTCTCTTGTAACACGCTATCC-3'<br>F: 5'-GCCTCTCCTATCTGCTATTTCAT-3' | 5'-ctgactgactgactgactgactgGGAGTGTATAAGGTGTGTAAGT-3'                         |
| rs2293152  | F: 5'-CAACAACGGCAGCCTCTC-3'<br>F: 5'-TCCCCAACAAAACCTTACATCACAA-3'   | 5'-ctgactgactgactgactgactgactgacTCACAAAGGGCCTCTGGCTGC-3'                    |
| rs7525979  | F: 5'-CCATCGGCAAGACCAAGAC-3'<br>F: 5'-CCAGGCTCCTCTGTGTCA-3'         | 5'-ctgactgactgactgactgactgactgactgactgactgactgactgTTCTGAGCCTGTGCACA<br>C-3' |
| rs35829419 | F: 5'-CTGTCATCGGGTGGAGTCA-3'                                        | 5'-ctgactgactgactgactgAGAGGAGCTTGGGAGGACACACT-3'                            |

|           |                                   |                                                       |
|-----------|-----------------------------------|-------------------------------------------------------|
|           | F: 5'-GCGAGGAAGCAGGAGGAA-3'       |                                                       |
| rs1785929 | F: 5'-TTCAGCATCATGGCAGGAAT-3'     | 5'-ctgactgaAGGAGTTCAATGTTCAATGGAA-3'                  |
|           | F: 5'-ACACATATCCCTTACTCCAGTTAA-3' |                                                       |
| rs1785928 | F: 5'-TTCTAGCCAAACTCCTGACTCTT-3'  | 5'-ctgactgactgactgactgacAGATGGTGTCTACAGCAGCCA-3'      |
|           | F: 5'-CAGTGAACATCCTTGCAGTACC-3'   |                                                       |
| rs1026916 | F: 5'-AACTGGAGTCTAGAACTGAATGA-3'  | 5'-cAAGTTTAACCCAAAGACTGT-3'                           |
|           | F: 5'-CCACGGACGTTTACCCTAA-3'      |                                                       |
| rs744166  | F: 5'-GAGTACAAACCCTGAACCCTTT-3'   | 5'-ctgaATGTCTTGAGGGAATCGAGC-3'                        |
|           | F: 5'-GGAGTGCCAACATTGAGAGG-3'     |                                                       |
| rs696     | F: 5'-GTACTTATATCCACACTGCACACT-3' | 5'-ctgactgATCCACACTGCACACTGCCT-3'                     |
|           | F: 5'-CAATGATCTTTCTCGTCCCCTAC-3'  |                                                       |
| rs4648068 | F: 5'-GGCTCATTGAACGTCTCTGT-3'     | 5'-ctgactgacTCTTGGTGAAATAATCCTTCA-3'                  |
|           | F: 5'-TTTAAGGGAACGACCATTATCTGT-3' |                                                       |
| rs530537  | F: 5'-TGCCAATCCCAACCACATC-3'      | 5'-ctgactgactCTTAATTTACAAAAACATTTGCA-3'               |
|           | F: 5'-ATGAAGCCTTTAACTGAGACTTGT-3' |                                                       |
| rs681757  | F: 5'-AATCACAAGTAGGTCAACCCAAAT-3' | 5'-ctgactgactgactgaGTCAAGTCTTCCTCAGTTATCCA-3'         |
|           | F: 5'-GGATACAATCTCACCTGAGTTCG-3'  |                                                       |
| rs559289  | F: 5'-TGGGACACTGGTGGGAAG-3'       | 5'-ctgactgactgactgactgactgacTCATTTGAAAGGTACTTGGAAC-3' |
|           | F: 5'-AAGAAGATAGGGAGTTTGGCAAA-3'  |                                                       |
| rs556205  | F: 5'-TGTGCTTATTTCTTATCTACTCC-3'  | 5'-ctgactgactgactgactgactgactgCCATGTAGACTGAGTATTGC-3' |
|           | F: 5'-ACAAGAGGTATCTGAGGTCAC-3'    |                                                       |

---

|           |                                        |                                               |
|-----------|----------------------------------------|-----------------------------------------------|
| rs2569190 | F: 5'-CCTCCTCTGTGAACCCTGAT-3'          | 5'-ctgaGCAGAATCCTTCCTGTTACGG-3'               |
|           | F: 5'-GCTTAGGCTCCCGAGTCA-3'            |                                               |
| rs4612666 | F: 5'-GGTTGCACAACAATGTGAAGT-3'         | 5'-TTCTCCAAGCTCCCACCAATACTAC-3'               |
|           | F: 5'-ATAACAAGTAAGCATTCTCCAAGC-3'      |                                               |
| rs1789547 | F: 5'-GAAGAAGAGATAAATGGGTTGTGGTAT-3'   | 5'-ctgactgactAGCTCTAGTTATTTGTTTTTATTGCA-3'    |
|           | F: 5'-TGGAATTATAGATATTACAGCTTGCCTTT-3' |                                               |
| rs2032206 | F: 5'-TGGGACACTGGTGGGAAG-3'            | 5'-ctgactgactgactgacTTGGTCATTATGGTGACTTAGG-3' |
|           | F: 5'-AAGAAGATAGGGAGTTTGGCAAA-3'       |                                               |
| rs1053004 | F: 5'-GGTTTTGAGTTGCCAAATCCG-3'         | 5'-CTGACTGATGTTCCCATACGCACAGGAGAGGC-3'        |
|           | F: 5'-TCGTATGAGGGTGTATACCTG-3'         |                                               |

---

SNP: Single Nucleotide Polymorphism; PCR: Polymerase Chain Reaction; F: Forward; R: Reverse.

**Table S2. HWE test outcomes of the 25 gene polymorphisms for healthy controls.**

| <b>SNP</b> | <b><math>\chi^2</math> value</b> | <b><i>P</i> value</b> |
|------------|----------------------------------|-----------------------|
| rs2043211  | 0.095                            | 0.758                 |
| rs10754558 | 0.779                            | 0.377                 |
| rs12185396 | 0.647                            | 0.421                 |
| rs8299     | 0.647                            | 0.421                 |
| rs580253   | <b>0.003</b>                     | 0.958                 |
| rs501192   | <b>0.003</b>                     | 0.958                 |
| rs4796793  | <b>0.008</b>                     | 0.927                 |
| rs2293152  | 0.686                            | 0.407                 |
| rs7525979  | 0.752                            | 0.386                 |
| rs35829419 | <b>0.001</b>                     | 0.979                 |
| rs1785929  | 1.253                            | 0.263                 |
| rs1785928  | 1.253                            | 0.263                 |
| rs1026916  | 0.034                            | 0.853                 |
| rs744166   | <b>0.004</b>                     | 0.950                 |
| rs696      | 3.122                            | 0.077                 |
| rs4648068  | <b>0.002</b>                     | 0.967                 |
| rs530537   | 0.304                            | 0.582                 |
| rs681757   | 0.511                            | 0.475                 |
| rs559289   | 0.511                            | 0.475                 |
| rs556205   | <b>0.003</b>                     | 0.958                 |

|           |       |       |
|-----------|-------|-------|
| rs2569190 | 1.057 | 0.304 |
| rs4612666 | 0.265 | 0.607 |
| rs1789547 | 0.151 | 0.697 |
| rs2032206 | 1.490 | 0.222 |

IL: Interleukin; HWE: Hardy-Weinber Equilibrium

**Table S3. Comparisons of genotype distribution, allele frequency, and genetic models of the remaining 21 SNPs between PTOM patients and healthy controls.**

| SNP       | Item              | Allele or genotype | Patients    | Controls    | <i>P</i> values | OR (95% CI)          |
|-----------|-------------------|--------------------|-------------|-------------|-----------------|----------------------|
| rs2043211 | Genotype (n, %)   | TT                 | 85 (27.78)  | 108 (29.35) | 0.731           | NA                   |
|           |                   | AT                 | 159 (51.96) | 180 (48.91) |                 |                      |
|           |                   | AA                 | 62 (20.26)  | 80 (21.74)  |                 |                      |
|           | Allele frequency  | T vs. A            | 329/283     | 396/340     | 0.987           | 0.998 (0.805, 1.238) |
|           | Dominant model    | TT+AT vs. AA       | 244/62      | 288/80      | 0.640           | 1.093 (0.753, 1.587) |
|           | Recessive model   | TT vs. AT+AA       | 85/221      | 108/260     | 0.654           | 0.926 (0.662, 1.296) |
|           | Homozygous model  | TT vs. AA          | 85/62       | 108/80      | 0.945           | 1.016 (0.656, 1.572) |
|           | Heterzygous model | AT vs. AA          | 159/62      | 180/80      | 0.515           | 1.140 (0.768, 1.691) |
| rs2569190 | Genotype (n, %)   | GG                 | 57 (18.63)  | 58 (15.76)  | 0.521           | NA                   |
|           |                   | AG                 | 145 (47.39) | 188 (51.09) |                 |                      |
|           |                   | AA                 | 104 (33.99) | 122 (33.15) |                 |                      |
|           | Allele frequency  | G vs. A            | 259/353     | 304/432     | 0.707           | 1.043 (0.839, 1.296) |
|           | Dominant model    | GG+AG vs. AA       | 202/104     | 246/122     | 0.819           | 0.963 (0.699, 1.328) |
|           | Recessive model   | GG vs. AG+AA       | 57/249      | 58/310      | 0.325           | 1.224 (0.819, 1.829) |
|           | Homozygous model  | GG vs. AA          | 57/104      | 58/122      | 0.535           | 1.153 (0.735, 1.807) |
|           | Heterzygous model | AG vs. AA          | 145/104     | 188/122     | 0.564           | 0.905 (0.644, 1.271) |
| rs1785929 | Genotype (n, %)   | AA                 | 9 (2.94)    | 9 (2.45)    | 0.444           | NA                   |
|           |                   | AG                 | 83 (27.12)  | 116 (31.52) |                 |                      |
|           |                   | GG                 | 214 (69.93) | 243 (66.03) |                 |                      |
|           | Allele frequency  | A vs. G            | 101/511     | 134/602     | 0.412           | 0.888 (0.668, 1.179) |

|            |                   |              |             |             |       |                      |
|------------|-------------------|--------------|-------------|-------------|-------|----------------------|
| rs1789547  | Dominant model    | AA+AG vs. GG | 92/214      | 125/243     | 0.280 | 0.836 (0.603, 1.158) |
|            | Recessive model   | AA vs. AG+GG | 9/297       | 9/359       | 0.691 | 1.209 (0.474, 3.084) |
|            | Homozygous model  | AA vs. GG    | 9/214       | 9/243       | 0.791 | 1.136 (0.443, 2.913) |
|            | Heterzygous model | AG vs. GG    | 83/214      | 116/243     | 0.226 | 0.812 (0.580, 1.137) |
|            | Genotype (n, %)   | TT           | 7 (2.29)    | 8 (2.17)    | 0.830 | NA                   |
|            |                   | CT           | 76 (24.84)  | 99 (26.90)  |       |                      |
|            |                   | CC           | 223 (72.88) | 261 (70.92) |       |                      |
|            | Allele frequency  | T vs. C      | 90/522      | 115/621     | 0.640 | 0.931 (0.690, 1.256) |
|            | Dominant model    | TT+CT vs. CC | 83/223      | 107/261     | 0.575 | 0.908 (0.648, 1.273) |
|            | Recessive model   | TT vs. CT+CC | 7/299       | 8/360       | 0.921 | 1.054 (0.378, 2.939) |
| rs1785928  | Homozygous model  | TT vs. CC    | 7/223       | 8/261       | 0.964 | 1.024 (0.366, 2.869) |
|            | Heterzygous model | CT vs. CC    | 76/223      | 99/261      | 0.547 | 0.898 (0.634, 1.273) |
|            | Genotype (n, %)   | AA           | 9 (2.94)    | 9 (2.45)    | 0.444 | NA                   |
|            |                   | AG           | 83 (27.12)  | 116 (31.52) |       |                      |
|            |                   | GG           | 214 (69.93) | 243 (66.03) |       |                      |
|            | Allele frequency  | A vs. G      | 101/511     | 134/602     | 0.412 | 0.888 (0.668, 1.179) |
|            | Dominant model    | AA+AG vs. GG | 92/214      | 125/243     | 0.280 | 0.836 (0.603, 1.158) |
|            | Recessive model   | AA vs. AG+GG | 9/297       | 9/359       | 0.691 | 1.209 (0.474, 3.084) |
|            | Homozygous model  | AA vs. GG    | 9/214       | 9/243       | 0.791 | 1.136 (0.443, 2.913) |
|            | Heterzygous model | AG vs. GG    | 83/214      | 116/243     | 0,226 | 0.812 (0.580, 1.137) |
| rs12185396 | Genotype (n, %)   | CC           | 212 (69.28) | 246 (66.85) | 0.761 | NA                   |
|            |                   | CT           | 85 (27.78)  | 110 (29.89) |       |                      |
|            |                   | TT           | 9 (2.94)    | 9 (2.45)    |       |                      |

|           |                   |              |             |             |       |                      |
|-----------|-------------------|--------------|-------------|-------------|-------|----------------------|
| rs681757  | Allele frequency  | C vs. T      | 509/103     | 602/128     | 0.734 | 1.051 (0.790, 1.397) |
|           | Dominant model    | CC+CT vs. TT | 297/9       | 356/9       | 0.704 | 0.834 (0.327, 2.129) |
|           | Recessive model   | CC vs. CT+TT | 212/94      | 246/119     | 0.602 | 1.091 (0.787, 1.531) |
|           | Homozygous model  | CC vs. TT    | 212/9       | 246/9       | 0.757 | 0.862 (0.336, 2.211) |
|           | Heterzygous model | CT vs. TT    | 85/9        | 110/9       | 0.600 | 0.773 (0.294, 2.031) |
|           | Genotype (n, %)   | GG           | 9 (2.94)    | 9 (2.45)    | 0.634 | NA                   |
|           |                   | GT           | 81 (26.47)  | 109 (29.62) |       |                      |
|           |                   | TT           | 216 (70.59) | 250 (67.93) |       |                      |
|           | Allele frequency  | G vs. T      | 99/513      | 127/609     | 0.598 | 0.925 (0.694, 1.234) |
|           | Dominant model    | GG+GT vs. TT | 90/216      | 118/250     | 0.458 | 0.883 (0.635, 1.227) |
| rs8299    | Recessive model   | GG vs. GT+TT | 9/297       | 9/359       | 0.691 | 1.209 (0.474, 3.084) |
|           | Homozygous model  | GG vs. TT    | 9/216       | 9/250       | 0.761 | 1.157 (0.451, 2.968) |
|           | Heterzygous model | GT vs. TT    | 81/216      | 109/250     | 0.385 | 0.860 (0.612, 1.209) |
|           | Genotype (n, %)   | TT           | 9 (2.94)    | 9 (2.45)    | 0.761 | NA                   |
|           |                   | CT           | 85 (27.78)  | 110 (29.89) |       |                      |
|           |                   | CC           | 212 (69.28) | 246 (66.85) |       |                      |
|           | Allele frequency  | T vs. C      | 103/509     | 128/602     | 0.734 | 0.952 (0.716, 1.266) |
|           | Dominant model    | TT+CT vs. CC | 94/212      | 119/246     | 0.602 | 0.917 (0.661, 1.271) |
|           | Recessive model   | TT vs. CT+CC | 9/297       | 9/356       | 0.704 | 1.199 (0.470, 3.058) |
|           | Homozygous model  | TT vs. CC    | 9/212       | 9/246       | 0.757 | 1.160 (0.452, 2.977) |
| rs2032206 | Heterzygous model | CT vs. CC    | 85/212      | 110/246     | 0.526 | 0.897 (0.640, 1.257) |
|           | Genotype (n, %)   | GG           | 150 (49.02) | 181 (49.18) | 0.636 | NA                   |
|           |                   | AG           | 129 (42.16) | 147 (39.95) |       |                      |



|           |                   |              |             |             |       |                      |
|-----------|-------------------|--------------|-------------|-------------|-------|----------------------|
|           |                   | AA           | 27 (8.82)   | 40 (10.87)  |       |                      |
|           | Allele frequency  | G vs. A      | 429/183     | 509/227     | 0.709 | 1.045 (0.828, 1.320) |
|           | Dominant model    | GG+AG vs. AA | 279/27      | 328/40      | 0.377 | 1.260 (0.754, 2.106) |
|           | Recessive model   | GG vs. AG+AA | 150/156     | 181/187     | 0.966 | 0.993 (0.734, 1.345) |
|           | Homozygous model  | GG vs. AA    | 150/27      | 181/40      | 0.451 | 1.228 (0.720, 2.094) |
|           | Heterzygous model | AG vs. AA    | 129/27      | 147/40      | 0.342 | 1.300 (0.756, 2.236) |
| rs559289  | Genotype (n, %)   | CC           | 9 (2.94)    | 9 (2.45)    | 0.634 | NA                   |
|           |                   | AC           | 81 (26.47)  | 109 (29.62) |       |                      |
|           |                   | AA           | 216 (70.59) | 250 (67.93) |       |                      |
|           | Allele frequency  | C vs. A      | 99/513      | 127/609     | 0.598 | 0.925 (0.694, 1.234) |
|           | Dominant model    | CC+AC vs. AA | 90/216      | 118/250     | 0.458 | 0.883 (0.635, 1.227) |
|           | Recessive model   | CC vs. AC+AA | 9/297       | 9/359       | 0.691 | 1.209 (0.474, 3.084) |
|           | Homozygous model  | CC vs. AA    | 9/216       | 9/250       | 0.761 | 1.157 (0.451, 2.968) |
|           | Heterzygous model | AC vs. AA    | 81/216      | 109/250     | 0.385 | 0.860 (0.612, 1.209) |
| rs4796793 | Genotype (n, %)   | CC           | 113 (36.93) | 134 (36.41) | 0.405 | NA                   |
|           |                   | CG           | 135 (44.12) | 175 (47.55) |       |                      |
|           |                   | GG           | 58 (18.95)  | 56 (15.22)  |       |                      |
|           | Allele frequency  | C vs. G      | 361/251     | 443/287     | 0.527 | 0.932 (0.748, 1.160) |
|           | Dominant model    | CC+CG vs. GG | 248/58      | 309/56      | 0.215 | 0.775 (0.518, 1.160) |
|           | Recessive model   | CC vs. CG+GG | 113/193     | 134/231     | 0.954 | 1.009 (0.737, 1.383) |
|           | Homozygous model  | CC vs. GG    | 113/58      | 134/56      | 0.364 | 0.814 (0.522, 1.270) |
|           | Heterzygous model | CG vs. GG    | 135/58      | 175/56      | 0.179 | 0.745 (0.484, 1.145) |
| rs744166  | Genotype (n, %)   | GG           | 63 (20.59)  | 66 (17.93)  | 0.680 | NA                   |

|           |                   |              |             |             |       |                      |
|-----------|-------------------|--------------|-------------|-------------|-------|----------------------|
| rs1026916 |                   | AG           | 143 (46.73) | 179 (48.37) |       |                      |
|           |                   | AA           | 100 (32.68) | 123 (33.42) |       |                      |
|           | Allele frequency  | G vs. A      | 269/343     | 311/425     | 0.531 | 1.072 (0.863, 1.331) |
|           | Dominant model    | GG+AG vs. AA | 206/100     | 245/123     | 0.838 | 1.034 (0.749, 1.428) |
|           | Recessive model   | GG vs. AG+AA | 63/243      | 66/302      | 0.383 | 1.186 (0.808, 1.742) |
|           | Homozygous model  | GG vs. AA    | 63/100      | 66/123      | 0.469 | 1.174 (0.760, 1.813) |
|           | Heterzygous model | AG vs. AA    | 143/100     | 179/123     | 0.920 | 0.983 (0.697, 1.385) |
|           | Genotype (n, %)   | GG           | 100 (32.68) | 123 (33.42) | 0.736 | NA                   |
|           |                   | AG           | 143 (46.73) | 178 (48.37) |       |                      |
|           |                   | AA           | 63 (20.59)  | 67 (18.21)  |       |                      |
|           | Allele frequency  | G vs. A      | 343/269     | 424/312     | 0.564 | 0.938 (0.756, 1.165) |
|           | Dominant model    | GG+AG vs. AA | 243/63      | 301/67      | 0.435 | 0.859 (0.585, 1.260) |
|           | Recessive model   | GG vs. AG+AA | 100/206     | 123/245     | 0.838 | 0.967 (0.700, 1.335) |
|           | Homozygous model  | GG vs. AA    | 100/63      | 123/67      | 0.511 | 0.865 (0.560, 1.334) |
| rs2293152 | Heterzygous model | AG vs. AA    | 143/63      | 178/67      | 0.450 | 0.854 (0.568, 1.285) |
|           | Genotype (n, %)   | CC           | 72 (23.53)  | 96 (26.09)  | 0.671 | NA                   |
|           |                   | CG           | 162 (52.94) | 190 (51.63) |       |                      |
|           |                   | GG           | 72 (23.53)  | 79 (21.47)  |       |                      |
|           | Allele frequency  | C vs. G      | 306/306     | 382/348     | 0.395 | 0.911 (0.735, 1.129) |
|           | Dominant model    | CC+CG vs. GG | 234/72      | 286/79      | 0.560 | 0.898 (0.624, 1.291) |
|           | Recessive model   | CC vs. CG+GG | 72/234      | 96/269      | 0.409 | 0.862 (0.606, 1.226) |
|           | Homozygous model  | CC vs. GG    | 72/72       | 96/79       | 0.387 | 0.823 (0.529, 1.280) |
|           | Heterzygous model | CG vs. GG    | 162/72      | 190/79      | 0.732 | 0.936 (0.639, 1.371) |
|           |                   |              |             |             |       |                      |

|           |                   |              |             |             |       |                       |
|-----------|-------------------|--------------|-------------|-------------|-------|-----------------------|
| rs696     | Genotype (n, %)   | TT           | 48 (15.69)  | 71 (19.29)  | 0.224 | NA                    |
|           |                   | CT           | 154 (41.85) | 162 (44.02) |       |                       |
|           |                   | CC           | 104 (33.99) | 135 (36.68) |       |                       |
|           | Allele frequency  | T vs. C      | 250/362     | 304/432     | 0.866 | 0.981 (0.789, 1.220)  |
|           | Dominant model    | TT+CT vs. CC | 202/104     | 233/135     | 0.466 | 1.125 (0.819, 1.546)  |
|           | Recessive model   | TT vs. CT+CC | 48/258      | 71/297      | 0.221 | 0.778 (0.520, 1.164)  |
|           | Homozygous model  | TT vs. CC    | 48/104      | 71/135      | 0.567 | 0.878 (0.561, 1.372)  |
|           | Heterzygous model | CT vs. CC    | 154/104     | 162/135     | 0.222 | 1.234 (0.880, 1.730)  |
| rs4648068 | Genotype (n, %)   | GG           | 61 (19.93)  | 82 (22.28)  | 0.224 | NA                    |
|           |                   | AG           | 160 (52.29) | 183 (49.73) |       |                       |
|           |                   | AA           | 85 (27.78)  | 103 (27.99) |       |                       |
|           | Allele frequency  | G vs. A      | 282/330     | 347/389     | 0.696 | 0.968 (0.773, 1.188)  |
|           | Dominant model    | GG+AG vs. AA | 221/85      | 265/103     | 0.951 | 1.011 (0.721, 1.417)  |
|           | Recessive model   | GG vs. AG+AA | 61/245      | 82/286      | 0.458 | 0.868 (0.598, 1.261)  |
|           | Homozygous model  | GG vs. AA    | 61/90       | 82/103      | 0.469 | 0.851 (0.551, 1.316)  |
|           | Heterzygous model | AG vs. AA    | 160/85      | 183/103     | 0.751 | 1.059 (0.741, 1.514)  |
| rs501192  | Genotype (n, %)   | TT           | 0 (0.0)     | 0 (0.0)     | NA    | NA                    |
|           |                   | CT           | 3 (0.98)    | 2 (0.55)    |       |                       |
|           |                   | CC           | 303 (99.02) | 363 (99.45) |       |                       |
|           | Allele frequency  | T vs. C      | 3/609       | 2/728       | 0.843 | 1.793 (0.299, 10.766) |
|           | Dominant model    | TT+CT vs. CC | 3/303       | 2/363       | 0.836 | 1.812 (0.301, 10.914) |
|           | Recessive model   | TT vs. CT+CC | 0/306       | 0/365       | NA    | NA                    |
|           | Homozygous model  | TT vs. CC    | 0/306       | 0/363       | NA    | NA                    |

|          |                   |              |             |             |       |                       |
|----------|-------------------|--------------|-------------|-------------|-------|-----------------------|
| rs580253 | Heterzygous model | CT vs. CC    | 3/303       | 2/363       | 0.836 | 1.812 (0.301, 10.914) |
|          | Genotype (n, %)   | AA           | 0 (0.0)     | 0 (0.0)     | NA    | NA                    |
|          |                   | AG           | 3 (0.98)    | 2 (0.55)    |       |                       |
|          |                   | GG           | 303 (99.02) | 363 (99.45) |       |                       |
|          | Allele frequency  | A vs. G      | 3/609       | 2/728       | 0.843 | 1.793 (0.299, 10.766) |
|          | Dominant model    | AA+AG vs. GG | 3/303       | 2/363       | 0.836 | 1.812 (0.301, 10.914) |
|          | Recessive model   | AA vs. AG+GG | 0/306       | 0/365       | NA    | NA                    |
| rs556205 | Homozygous model  | AA vs. GG    | 0/303       | 0/363       | NA    | NA                    |
|          | Heterzygous model | AG vs. GG    | 3/303       | 2/363       | 0.836 | 1.812 (0.301, 10.914) |
|          | Genotype (n, %)   | GG           | 0 (0.0)     | 0 (0.0)     | NA    | NA                    |
|          |                   | GT           | 3 (0.98)    | 2 (0.54)    |       |                       |
|          |                   | TT           | 303 (99.02) | 366 (99.46) |       |                       |
|          | Allele frequency  | G vs. T      | 3/609       | 2/734       | 0.836 | 1.808 (0.301, 10.854) |
|          | Dominant model    | GG+GT vs. TT | 3/303       | 2/366       | 0.836 | 1.812 (0.301, 10.914) |
| rs530537 | Recessive model   | GG vs. GT+TT | 0/306       | 0/368       | NA    | NA                    |
|          | Homozygous model  | GG vs. TT    | 0/303       | 0/366       | NA    | NA                    |
|          | Heterzygous model | GT vs. TT    | 3/303       | 2/366       | 0.836 | 1.812 (0.301, 10.914) |
|          | Genotype (n, %)   | CC           | 10 (3.27)   | 22 (5.98)   | 0.193 | NA                    |
|          |                   | CT           | 132 (43.14) | 144 (39.13) |       |                       |
|          |                   | TT           | 164 (53.59) | 202 (54.89) |       |                       |
|          | Allele frequency  | C vs. T      | 152/460     | 188/548     | 0.766 | 0.963 (0.752, 1.233)  |
|          | Dominant model    | CC+CT vs. TT | 142/164     | 166/202     | 0.737 | 1.054 (0.777, 1.428)  |
|          | Recessive model   | CC vs. CT+TT | 10/296      | 22/346      | 0.099 | 0.531 (0.248, 1.140)  |

|           |                   |              |             |             |       |                      |
|-----------|-------------------|--------------|-------------|-------------|-------|----------------------|
| rs1053004 | Homozygous model  | CC vs. TT    | 10/164      | 22/202      | 0.138 | 0.560 (0.258, 1.216) |
|           | Heterzygous model | CT vs. TT    | 132/164     | 144/202     | 0.448 | 1.129 (0.825, 1.545) |
|           | Genotype (n, %)   | AA           | 125 (40.98) | 143 (39.61) | 0.396 | NA                   |
|           |                   | AG           | 140 (45.90) | 157 (43.49) |       |                      |
|           |                   | GG           | 40 (13.11)  | 61 (16.90)  |       |                      |
|           | Allele frequency  | A vs. G      | 390/220     | 443/279     | 0.333 | 1.116 (0.893, 1.395) |
|           | Dominant model    | AA+AG vs. GG | 265/40      | 300/61      | 0.175 | 1.347 (0.875, 2.074) |
|           | Recessive model   | AA vs. AG+GG | 125/180     | 143/218     | 0.719 | 1.059 (0.776, 1.444) |
|           | Homozygous model  | AA vs. GG    | 125/40      | 143/61      | 0.225 | 1.333 (0.837, 2.123) |
|           | Heterzygous model | AG vs. GG    | 140/40      | 157/61      | 0.189 | 1.360 (0.859, 2.153) |

PTOM: Posttraumatic osteomyelitis; OR: odds ratio, CI: confidence interval; NA: not available.
